# Supplementary material for: Glucagon-like peptide-1 analogues: a new way to quit smoking? (SKIP)—a structured summary of a study protocol for a randomized controlled study
Source: PubMed Central journal article supplement (PMC10120253; doi:10.1186/s13063-023-07164-9), 2023-04-20
Supplement: 13063_2023_7164_MOESM2_ESM.pdf [file 13063_2023_7164_MOESM2_ESM.pdf]

**Visual Analogue Scale smoking urge 0-10**

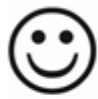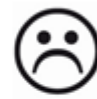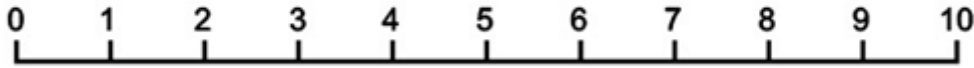

No urge at  
all for  
nicotine

Maximal urge  
for nicotine
